# Supplementary material for: Impaired Fasting Glucose Is Associated With Renal Hyperfiltration in the General Population
Source: Oxford University Press journal article supplement (doi:10.2337/dc11-0235), 2011-05-19

**Supplementary Figure 1. A flow diagram of the in the Renal Iohexol Clearance Survey in Tromsø 6 (RENIS T6)**

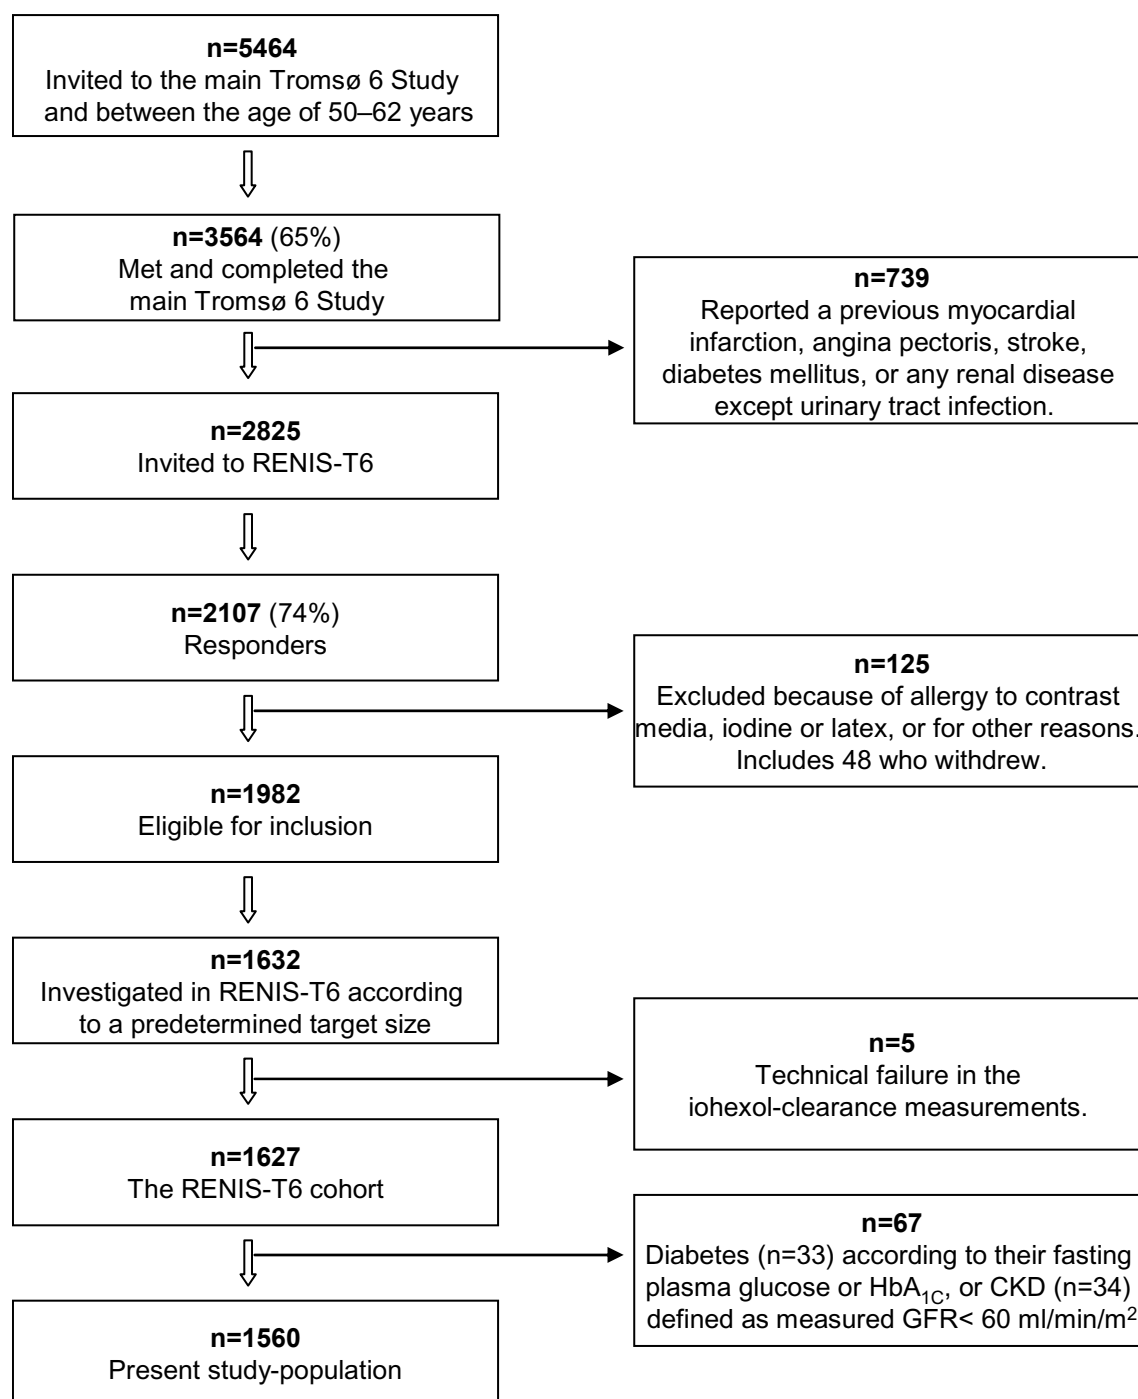

Supplement: dc110235supplementarydata.pdf [file dc110235supplementarydata.pdf]
